# Supplementary material
Source: Elsevier journal article supplement (https://www.sciencedirect.com/science/article/pii/S1138359320300095)
Supplement: mmc1 [file S1138359320300095:mmc1.docx]

**ANEXOS**

**Anexo 1**

**ENCUESTA SOBRE EL CONSUMO DE TABACO EN ALUMNOS DE BACHILLERATO DE EXCELENCIA EN LA COMUNIDAD DE MADRID.**

Esta encuesta se va a realizar de forma anónima, para valorar el consumo de tabaco en alumnos de Bachillerato de Excelencia de la Comunidad de Madrid. Como sabéis el hábito de fumar es elevado

en la población general y se suele iniciar en la adolescencia. Por ese motivo se va a intentar relacionarlo con hábitos o conductas del ambiente que nos rodea. Los datos de las respuestas van a ser tratados de forma anónima respetando vuestra intimidad y luego serán procesados mediante estudios estadísticos para completar el trabajo.

Os ruego que las respuestas sean sinceras para no desvirtuar la calidad del estudio.

| **1)** | Género: Hombre:....... | | Mujer:.......... | |  |  |  |
| --- | --- | --- | --- | --- | --- | --- | --- |
| **2)** | Fecha de nacimiento:.......... | | /............ | /.......... | Lugar de residencia: Rural / | | Urbano |
| **3)** | Altura: ....... | Peso: ...... | |  |  |  |  |
| **4)** | Fuma tabaco: SÍ / NO. Desde cuándo/ fecha de inicio aproximada: ..../..... | | | | | | /........ |
| **5)** | Cuántos cigarrillos fuma al día:.... | | | y a la semana: ...... | | o en fines de semana:.... | |

1. En la iniciación a fumar ¿Quién crees que te influyó más?:

Familiar / amigos-compañeros / No lo sabes

1. ¿Consumes o has consumido otras sustancias tóxicas distintas al tabaco o el alcohol?: SÍ / NO
2. Tomas alcohol: SI / NO. Habitualmente: SI / NO; en fines de semana: SI / NO

| **9)** ¿Desearías abandonar el hábito de fumar?: SI / | | | NO /No lo sabes | |
| --- | --- | --- | --- | --- |
| **10)** | Padece alguna enfermedad: SI / | NO / | ¿Cual? | (en letras mayúsculas) |
| ............................................................................................................... | | | | |
| **11)** | Nivel de estudios del padre: primarios / | medios | / superiores | |
| **12)** | Nivel de estudios de la madre: primarios/ medios/ | | superiores | |
| **13)** | Fuma el padre: SI / NO | Fuma la madre: SI / | | NO |

1. Tiene hermanos: SI /NO. ¿Fuma alguno?: SI / NO
2. Fuman los amigos/compañeros: SÍ / NO
3. En su entorno familiar / amistades han sufrido algún proceso de cáncer, enfermedad

respiratoria, enfermedad cardio-vascular: SI / NO

**Muchas gracias por tu colaboración.**

**TABLAS Y GRÁFICOS**

**Tabla 1: Distribución de los alumnos en los distintos IES (2019).**

Nº IES Ciudad Nº alumnos Encuestas entregadas Encuestas recogidas Encuestas válidas

| 1 | Madrid | 250 | 250 | 242 | 237 |
| --- | --- | --- | --- | --- | --- |
|  |  |  |  |  |  |
| 2 | Valdemoro | 36 | 36 | 32 | 32 |
|  |  |  |  |  |  |
| 3 | Tres Cantos | 51 | 51 | 50 | 50 |
|  |  |  |  |  |  |
| 4 | Boadilla del Monte | 38 | No aceptaron participar | 0 | 0 |
|  |  |  |  |  |  |
| 5 | Las Rozas | 57 | 57 | 57 | 54 |
|  |  |  |  |  |  |
| 6 | Alcorcón | 44 | 44 | 43 | 43 |
|  |  |  |  |  |  |
| 7 | Torrejón de Ardoz | 58 | 58 | 58 | 58 |
|  |  |  |  |  |  |
| 8 | Pozuelo de Alarcón | 48 | 48 | 45 | 45 |
|  |  |  |  |  |  |
| 9 | Torrelodones | 49 | No aceptaron participar | 0 | 0 |
|  |  |  |  |  |  |
| 10 | Getafe | 31 | 31 | 31 | 31 |
|  |  |  |  |  |  |
| 11 | Móstoles | 50 | 50 | 45 | 45 |
|  |  |  |  |  |  |
| 12 | Ciempozuelos | 35 | 35 | 35 | 35 |
|  |  |  |  |  |  |
| 13 | Majadahonda | 56 | 56 | 55 | 55 |
|  |  |  |  |  |  |
| 14 | Alcalá de Henares | 56 | 56 | 56 | 55 |
|  |  |  |  |  |  |
| Total |  | 859 | 772 | 749 | 740 |
|  |  |  |  |  |  |

**Tabla 2. Estudio descriptivo de 2019: Tabla con valores cuantitativos, frecuencias y porcentajes.**

|  | Valor (2019) | Frecuencia/% |
| --- | --- | --- |
|  | N= 740 | (2019) |
|  |  |  |

| Edad,±DE | 16'57(0'61) |  |
| --- | --- | --- |
|  |  |  |
| Altura±DE | 1'71(0'09) |  |
|  |  |  |
| Peso±DE | 61'58(10'94) |  |
|  |  |  |
| IMC±DE | 20'99(2'73) |  |
|  |  |  |
| Edad inicio±DE | 14'35(2'31) |  |
|  |  |  |
| Cigar /dia±DE | 1'8(2'76) |  |
|  |  |  |
| Cigar/sem±DE | 11'5(17'8) |  |
|  |  |  |
| Cigar/finde±DE | 4(5'48) |  |
|  |  |  |
| Género: n(%) |  | 740(100) |
| Hombre |  | 310(41'89) |
| Mujer |  | 430 (58'11) |
|  |  |  |
| Residencia: n(%) |  | 664(100) |
| Rural |  | 38 (5'72) |
| Urbana |  | 626(94'28) |
|  |  |  |
| Fumador: n(%) |  | 738(100) |
| SI |  | 53 (7'18) |
| NO |  | 685 (92'82) |
|  |  |  |
| Alcohol: n(%) |  | 735(100) |
| Si |  | 349 (47'48) |
| No |  | 386(52'52) |
|  |  |  |
| Alcohol habitual: n(%) |  | 345(100) |
| SI |  | 14(4) |
| NO |  | 331(95'38) |
|  |  |  |
| Alcohol finde :n(%) |  | 339(100) |
| SI |  | 192 (56'64) |
| NO |  | 147 (43'36) |
|  |  |  |
| Otra sustancia:n(%) |  | 714(100) |
| SI |  | 109(15'27) |
| NO |  | 605(84'73) |
|  |  |  |
| Enfermedad: n(%) |  | 703(100) |
| SI |  | 72(10'24) |
| NO |  | 631(89'76) |
|  |  |  |
| Estudios padre: n(%) |  | 730(100) |
| Primarios |  | 36(4'93) |
| Medios |  | 183(25'07) |
| Superiores |  | 511(70) |
|  |  |  |
| Estudios madre: n(%) |  | 737(100) |
| Primarios |  | 26 (3'53) |
| Medios |  | 185 (25'10) |
| Superiores |  | 526 (71'37) |
|  |  |  |
| Fuma Padre: n(%) |  | 733(100) |
| SI |  | 118 (16'10) |
| NO |  | 615(83'90) |
|  |  |  |
| Fuma Madre: n(%) |  | 734(100) |
| SI |  | 106(14'44) |
| NO |  | 628(85'56) |
|  |  |  |

| Hermanos :n(%) |  | 738(100) | |
| --- | --- | --- | --- |
| SI |  | 617 | (83'6) |
| NO |  | 121 | (16'4) |
|  |  |  | |
| Fuma hermano: n(%) |  | 629(100) | |
| SI |  | 54(8'59) | |
| NO |  | 575(91'41) | |
|  |  |  | |
| Fuma amigo :n(%) |  | 735(100) | |
| SI |  | 488 | (66'39) |
| NO |  | 247 | (33'61) |
|  |  |  | |
| Influencia inicio :n(%) |  | 50(100) | |
| Familiar |  | 3 (6) | |
| Amigo |  | 39(78) | |
| No sabe |  | 8(16) | |
|  |  |  | |
| Deseo abandono :n(%) |  | 48(100) | |
| SI |  |  |  |
| NO |  | 20(41'67) | |
| No sabe |  | 13(27'08) | |
|  |  | 15(31'25) | |
|  |  |  | |
| Enferme. entorno: n(%) |  | 733(100) | |
| SI |  | 412 | (56'21) |
| NO |  | 321(43'71) | |
|  |  |  |  |

**Tabla 3: Comparación entre fumadores, y no fumadores (2019).**

|  | **Total** | **Fumador** | **No fumador** | **p-valor** |
| --- | --- | --- | --- | --- |
|  | **n =738 (100%)** | **n = 53 (7,18%)** | **n= 685 (92,82%)** |  |
|  |  |  |  |  |
| Edad, media (± DE) | 16'57(0'61) | 16'60(0'63) | 16'56(0'61) | 0'54 |
|  |  |  |  |  |
| Edad inicio (± DE) |  | 14'35(2'31) |  |  |
|  |  |  |  |  |
| Género, n (%) | 738 (100%) | 53 | 685 | 0'61 |
| Mujer | 428(57’9%) | 29(54'72%) | 399(58'25%) |  |
| Hombre | 310(42%) | 24(45'28%) | 286(41'75%) |  |
|  |  |  |  |  |
| Altura,media | 1.71(0'9) | 1'71 (0'09) | 1'71 (0'09) | 0'98 |
|  |  |  |  |  |
| Peso,media(± DE) | 61'58(10'94) | 62'96 (11'13) | 61'48 (10'93) | 0'38 |
|  |  |  |  |  |

| IMC, media (± DE) | 20'99(2'73) | 21'46 (2'56) | | 20'96 (2'74) | | 0'11 |
| --- | --- | --- | --- | --- | --- | --- |
|  |  |  |  |  |  |  |
| Residencia, n(%) | 663 (100%) | 47 | (7%) | 616 | (93%) | 0'65 |
| Rural | 38(57%) | 2(4'26%) | | 36(5'84%) | |  |
| Urbana | 625(44’3%) | 45(95'74%) | | 580(94'16% | |  |
|  |  |  |  |  |  |  |
| Otras sustancias,n(%): | 714 (100%) | 51 | (7,1%) | 663 | (92,9%) | < 0'0001 |
| SI | 109(15,27%) | 31(60'78%) | | 78(11'76%) | |  |
| NO | 605(84,73%) | 20(39'22%) | | 585(88'23%) | |  |
|  |  |  |  |  |  |  |
| Alcohol,n(%): | 733 (100%) | 53 | (7,2%) | 680 | (92,8) | <0'0001 |
| SI | 348(47’5%) | 48(90'57%) | | 300(44'12%) | |  |
| NO | 385(52’5%) | 5(9'43%) | | 380(55'88%) | |  |
|  |  |  |  |  |  |  |
| Influencia inicio,n(%): | 49/100%) | 49 | (100%) |  |  | 0'86 |
| Familiar |  | 3(6'12%) | |  |  |  |
| Amigos |  | 38(77'55%) | |  |  |  |
| Desconoce |  | 8(16'33%) | |  |  |  |
|  |  |  |  |  |  |  |
| Deseo de abandono,n(%): | 47 (100%) | 47 | (100%) |  |  | 0'32 |
| SI |  | 20(42'55%) | |  |  |  |
| NO |  | 13(27'66%) | |  |  |  |
| Indeciso |  | 14(29'8%) | |  |  |  |
|  |  |  |  |  |  |  |
| Enfermedad,n(%): | 702 (100%) | 53 | (7’2%) | 649 | (92’8%) | 0'25 |
| SI | 72(10%) | 3(5'66%) | | 69(10'63%) | |  |
| NO | 630(90%) | 50(94'34%) | | 580(89'37%) | |  |
|  |  |  |  |  |  |  |
| Estudios padre,n(%): | 728 (100%) | 52 | (7’1%) | 676 | (92’9%) | 0'063 |
| Primarios | 36(4’94%) | 3(5'77%) | | 33(4'88%) | |  |
| Medios | 183(25’14%) | 6(11'54%) | | 177(26'18%) | |  |
| Superiores | 509(69’91%) | 43(82'69%) | | 466(68'93%) | |  |
|  |  |  |  |  |  |  |
| Estudios madre,n(%): | 735 (100%) | 53 | (7’2%) | 682 | (92’8%) | 0'11 |
| Primarios | 26(3’5%) | 2(3'77%) | | 24(3'52%) | |  |
| Medios | 184(25’03%) | 7(13'21%) | | 177(25'95%) | |  |
| Superiores | 525(71’43%) | 44(83'02%) | | 481(70'53%) | |  |
|  |  |  |  |  |  |  |
| Fuma Padre,n(%): | 731 (100%) | 52 | (7’1%) | 679 | (92’8%) | 0'81 |
| SI | 118(16’14%) | 9(17'31%) | | 109(16'05%) | |  |
| NO | 613(83’86%) | 43(82'69%) | | 570(83'95%) | |  |
|  |  |  |  |  |  |  |
| Fuma Madre,n(%): | 732(100%) | 53 | (7’2%) | 679 | (92’8%) | 0'0002 |
| SI | 106(14’48%) | 17(32'08%) | | 89(13'11%) | |  |
| NO | 626(85’52%) | 36(67'92%) | | 590(86'89%) | |  |
|  |  |  |  |  |  |  |
| Hermanos,n(%): | 736 (100%) | 53 | (7’2%) | 683 | ( 92’8%) | 0'91 |
| SI | 615(83’55%) | 44(83'02%) | | 571(85'60%) | |  |
| NO | 121(16’45%) | 9(16'98%) | | 112(16'40%) | |  |
|  |  |  |  |  |  |  |
| Fuma hermano,n(%): | 627 (100%) | 46 | (7’3%) | 581 | (92’7%) | 0'0001 |
| SI | 54(8’6%) | 11(23'91%) | | 43(7'4%) | |  |
| NO | 573(91’4%) | 35(76'09%) | | 538(92'6%) | |  |
|  |  |  |  |  |  |  |
| Fuma amigo,n(%): | 733 (100%) | 53 | (7’2%) | 680 | (92’8%) | <0'0001 |
| SI | 486(66’30%) | 52(98'11%) | | 434(63'82%) | |  |
| NO | 247(33’70%) | 1(1'89%) | | 246(36'18%) | |  |
|  |  |  |  |  |  |  |
| Enfermedad Entorno,n(%): | 731 (100%) | 53 | (7’2%) | 678 | (92’8%) | 0'17 |
| SI | 410(56%) | 25(47'17%) | | 385(56'78%) | |  |
| NO | 321(44%) | 28(52'83%) | | 293(43'22% | |  |
|  |  |  |  |  |  |  |

**Tabla 4. Estudio descriptivo comparativo entre 2014 y 2019: Tabla con valores cuantitativos, frecuencias y porcentajes.**

|  | Valor (2014) | Frecuencia/% (2014) | Valor (2019) | Frecuencia/% (2019) | P-valor |
| --- | --- | --- | --- | --- | --- |
|  | N=322 |  | N= 740 |  |  |
|  |  |  |  |  |  |
| Edad,±DE | 16(0'67) |  | 16'57(0'61) |  | 0'69 |
|  |  |  |  |  |  |
| Altura±DE | 1'71(0'10) |  | 1'71(0'09) |  | 0'30 |
|  |  |  |  |  |  |
| Peso±DE | 61'74(10'27) |  | 61'58(10'94) |  | 0'59 |
|  |  |  |  |  |  |
| IMC±DE | 20'92(2'49) |  | 20'99(2'73) |  | 0'73 |
|  |  |  |  |  |  |
| Edad inicio±DE | 14'63(1'15) |  | 14'35(2'31) |  | 0'53 |
|  |  |  |  |  |  |
| Cigar /dia±DE | 2'92(5'39) |  | 1'8(2'76) |  | 0'46 |
|  |  |  |  |  |  |
| Cigar/sem±DE | 10'83(12) |  | 11'5(17'8) |  | 0'79 |
|  |  |  |  |  |  |
| Cigar/finde±DE | 5'5(4'59) |  | 4(5'48) |  | 0'12 |
|  |  |  |  |  |  |

| Género,n(%): |  | 322(100) |  | 740(100) | |  |
| --- | --- | --- | --- | --- | --- | --- |
| Hombre |  | 156(48'45) |  | 310(41'89) | | 0'047 |
| Mujer |  | 166(51'55) |  | 430 | (58'11) |  |
|  |  |  |  |  | |  |
| Residencia,n(%): |  | 322(100) |  | 664(100) | | 0'91 |
| Rural |  | 19(5'9) |  | 38 (5'72) | |  |
| Urbana |  | 303(94'10) |  | 626(94'28) | |  |
|  |  |  |  |  | |  |
| Fumador,n(%) |  | 322(100) |  | 738(100) | | 0'34 |
| SI |  | 18(5'59) |  | 53 (7'18) | |  |
| NO |  | 304(94'41) |  | 685 | (92'82) |  |
|  |  |  |  |  | |  |
| Alcohol,n(%): |  | 322(100) |  | 735(100) | | <0'0001 |
| Si |  | 173(53'73) |  | 349 | (47'48) |  |
| No |  | 149(46'27) |  | 386(52'52) | |  |
|  |  |  |  |  | |  |
| Alcohol habitual,n(%): |  | 291(100) |  | 345(100) | | 0'299 |
| SI |  | 16(5'5) |  | 14(4) | |  |
| NO |  | 275(94'5) |  | 331(95'38) | |  |
|  |  |  |  |  | |  |
| Alcohol finde,n(%): |  | 289(100) |  | 339(100) | | <0'0001 |
| SI |  | 103(35'64) |  | 192 | (56'64) |  |
| NO |  | 186(64'36) |  | 147 | (43'36) |  |
|  |  |  |  |  | |  |
| Otra sustancia,n(%): |  | 322(100) |  | 714(100) | | <0'0001 |
| SI |  | 104(32'30) |  | 109(15'27) | |  |
| NO |  | 218(67'70) |  | 605(84'73) | |  |
|  |  |  |  |  | |  |
| Enfermedad,n(%): |  | 322(100) |  | 703(100) | | 0'35 |
| SI |  | 27(8'39) |  | 72(10'24) | |  |
| NO |  | 295(91'61) |  | 631(89'76) | |  |
|  |  |  |  |  | |  |
| Estudios padre,n(%): |  | 318(100) |  | 730(100) | | 0'0164 |
| Primarios |  | 30(9.43) |  | 36(4'93) | |  |
| Medios |  | 69 (21'70) |  | 183(25'07) | |  |
| Superiores |  | 219 (68'87) |  | 511(70) | |  |
|  |  |  |  |  | |  |
| Estudios madre,n(%): |  | 319(100) |  | 737(100) | | 0'0036 |
| Primarios |  | 22(6'90) |  | 26 (3'53) | |  |
| Medios |  | 99(31'03) |  | 185 | (25'10) |  |
| Superiores |  | 198(62'07) |  | 511 | (71'37) |  |
|  |  |  |  |  | |  |
| Fuma Padre,(%): |  | 321(100) |  | 733(100) | | 0'04 |
| SI |  | 68(21'18) |  | 118 | (16'10) |  |
| NO |  | 253(78'82) |  | 615(83'90) | |  |
|  |  |  |  |  | |  |
| Fuma Madre,n(%): |  | 322(100) |  | 734(100) | | 0'02 |
| SI |  | 64(19'88) |  | 106(14'44) | |  |
| NO |  | 258(80'12) |  | 628(85'56) | |  |
|  |  |  |  |  | |  |
| Hermanos,n(%): |  | 322(100) |  | 738(100) | | 0'82 |
| SI |  | 271(84'16) |  | 617 | (83'6) |  |
| NO |  | 51(15'84) |  | 121 | (16'4) |  |
|  |  |  |  |  | |  |
| Fuma hermano,n(%): |  | 142(100) |  | 629(100) | | 0'36 |
| SI |  | 29(10'47) |  | 54(8'59) | |  |
| NO |  | 113(89'53) |  | 575(91'41) | |  |
|  |  |  |  |  | |  |
| Fuma amigo,n(%): |  | 320 ( 100) |  | 735(100) | | 0'59 |
| SI |  | 207(64'69) |  | 488 | (66'39) |  |
| NO |  | 113(35'31) |  | 247 | (33'61) |  |
|  |  |  |  |  | |  |
| Influencia inicio,n(%): |  | 17(100) |  | 50(100) | | 0'16 |
| Familiar |  | 0 |  | 3 (6) | |  |
| Amigo |  | 11(64'71) |  | 39(78) | |  |
|  |  |  |  |  |  |  |

| No sabe |  | 6(35'29) | |  | 8(16) |  |
| --- | --- | --- | --- | --- | --- | --- |
|  |  |  | |  |  |  |
| Deseo abandono,n(%): |  | 15(100) | |  | 48(100) | 0'51 |
| SI |  | 4(26'67) | |  | 20(41'67) |  |
| NO |  | 6 | (40) |  | 13(27'08) |  |
| No sabe |  | 5 | (33'33) |  | 15(31'25) |  |
|  |  |  | |  |  |  |
| Enferme. entorno,n(%): |  | 322(100) | |  | 733(100) | 0'70 |
| SI |  | 185(57'45) | |  | 412 (56'21) |  |
| NO |  | 137 (42'55) | |  | 321(43'71) |  |
|  |  |  |  |  |  |  |
